# Supplementary material for: Intention to vaccinate against COVID-19 and adherence to non-pharmaceutical interventions against COVID-19 prior to the second wave of the pandemic in Uganda: a cross-sectional study
Source: PubMed Central journal article supplement — BMJ Open. 2022 Jun 2;12(6):e057322. doi: 10.1136/bmjopen-2021-057322 (PMC9163003; doi:10.1136/bmjopen-2021-057322), 2022-06-02
Supplement: bmjopen-2021-057322supp001.pdf [file bmjopen-2021-057322supp001.pdf]

## Supplementary file1: Understanding the drivers of non-adherence towards COVID19 preventive measures in Uganda

| No                                                                   | Question                                                                             | Response options                                                                                                                                                                                                                                                                           |
|----------------------------------------------------------------------|--------------------------------------------------------------------------------------|--------------------------------------------------------------------------------------------------------------------------------------------------------------------------------------------------------------------------------------------------------------------------------------------|
| <b>Questionnaire identifiers</b>                                     |                                                                                      |                                                                                                                                                                                                                                                                                            |
| A1                                                                   | District                                                                             |                                                                                                                                                                                                                                                                                            |
| A2                                                                   | Region                                                                               | <ol style="list-style-type: none"> <li>1. North</li> <li>2. East</li> <li>3. Central</li> <li>4. West</li> </ol>                                                                                                                                                                           |
| A3                                                                   | Area of residence                                                                    | <ol style="list-style-type: none"> <li>1. Rural</li> <li>2. Urban</li> </ol>                                                                                                                                                                                                               |
| <b>Socio-Demographic characteristics (Circle the response given)</b> |                                                                                      |                                                                                                                                                                                                                                                                                            |
| B1                                                                   | Sex of the respondent                                                                | <ol style="list-style-type: none"> <li>a) Male</li> <li>b) Female</li> </ol>                                                                                                                                                                                                               |
| B2                                                                   | Education status of the respondent ( <b>Highest level attained</b> )                 | <ol style="list-style-type: none"> <li>a) No formal education</li> <li>b) Primary</li> <li>c) Secondary</li> <li>d) Tertiary</li> </ol>                                                                                                                                                    |
| B3                                                                   | Current occupation                                                                   | <ol style="list-style-type: none"> <li>a) Unemployed/retiree/housewife</li> <li>b) Employed</li> <li>c) Self-employed</li> <li>d) Casual labourers</li> <li>e) Farmer</li> <li>f) Others</li> </ol>                                                                                        |
| B4                                                                   | How many people stay in your home, currently?<br><i>Write the whole number</i>       |                                                                                                                                                                                                                                                                                            |
| <b>Knowledge on COVID-19 and the preventive measures</b>             |                                                                                      |                                                                                                                                                                                                                                                                                            |
| C1                                                                   | What are some of the ways in which COVID-19 can be spread from one person to another | <ol style="list-style-type: none"> <li>a) Touching one's soft parts (eyes, nose, mouth) with contaminated hands.</li> <li>b) inhaling of infected droplets from from coughing, sneezing, laughing</li> <li>c) Physical contact with an infected person</li> <li>d) Others</li> </ol>       |
| C2                                                                   | List some of the symptoms of COVID-19 that you know                                  | <ol style="list-style-type: none"> <li>a) High temperature/ fever</li> <li>b) Coughing</li> <li>c) Sneezing</li> <li>d) Difficulty in breathing</li> <li>e) Sore throat</li> <li>f) Loss of sense of smell and taste</li> <li>g) Others (specify)</li> <li>h) None of the above</li> </ol> |

|    |                                                                                                                                                                                                            |                                                                                                                                                                                                                                                                                                                                                                                                                                                                                                                                                                                                                                                                                                                   |
|----|------------------------------------------------------------------------------------------------------------------------------------------------------------------------------------------------------------|-------------------------------------------------------------------------------------------------------------------------------------------------------------------------------------------------------------------------------------------------------------------------------------------------------------------------------------------------------------------------------------------------------------------------------------------------------------------------------------------------------------------------------------------------------------------------------------------------------------------------------------------------------------------------------------------------------------------|
| C3 | Have you heard about how to prevent the COVID_19?<br>(If the interviewee is unresponsive, the facilitator asks a clarification question: It is also called COVID-19; Have you heard of how to prevent it?) | <ul style="list-style-type: none"> <li>a) Yes</li> <li>b) No</li> </ul>                                                                                                                                                                                                                                                                                                                                                                                                                                                                                                                                                                                                                                           |
| C4 | What are your sources of information on COVID-19                                                                                                                                                           | <ul style="list-style-type: none"> <li>a) Family member</li> <li>b) Health staff (including VHT)</li> <li>c) Phone (messages and calls)</li> <li>d) Radio</li> <li>e) Television</li> <li>f) Church / Mosque</li> <li>g) Community member/ village health Team Member.</li> <li>h) Social media (Facebook, WhatsApp, twitter)</li> <li>i) Internet</li> <li>j) Others (specify</li> </ul>                                                                                                                                                                                                                                                                                                                         |
| C5 | Of these, what is your most trusted source of information on COVID-19                                                                                                                                      | <ul style="list-style-type: none"> <li>a. Family member</li> <li>b. Health staff (including VHT)</li> <li>c. Phone (messages and calls)</li> <li>d. Radio</li> <li>e. Television</li> <li>f. Church / Mosque</li> <li>g. Community member/ village health Team Member.</li> <li>h. Social media (Facebook, WhatsApp, twitter)</li> <li>i. Internet</li> <li>j. Others (specify</li> </ul>                                                                                                                                                                                                                                                                                                                         |
| C6 | How can COVID-19 be prevented? (Mention all prevention measures that you know)                                                                                                                             | <ul style="list-style-type: none"> <li>a) Wearing a face mask in public spaces</li> <li>b) Regular and thorough washing hands with soap and water or an alcohol-based rub</li> <li>c) Covering mouth and nose with bent blow or tissue when coughing and sneezing</li> <li>d) Clean and disinfect surfaces that are regularly touched</li> <li>e) Keep at least two-meter distance between self and others</li> <li>f) Avoiding crowded places</li> <li>g) Avoid touching eyes, nose, and mouth</li> <li>h) Staying home if you have symptoms such as headache, cough or mild fever</li> <li>i) Refrain from smoking and other activities that weaken the lungs.</li> <li>j) Avoid unnecessary travels</li> </ul> |

|                                                                                                 |                                                                                                                                  |                                                                     |
|-------------------------------------------------------------------------------------------------|----------------------------------------------------------------------------------------------------------------------------------|---------------------------------------------------------------------|
| C7                                                                                              | Isolation and treatment of people who are infected with the COVID-19 virus are effective ways to reduce the spread of the virus. | a) Yes<br>b) No<br>c) I don't know                                  |
| <b>COVID-19 perceived risk and severity, and perceptions on COVID-19 preventive guidelines.</b> |                                                                                                                                  |                                                                     |
| <b>D. Perception on COVID-19 preventive measures</b>                                            |                                                                                                                                  |                                                                     |
|                                                                                                 | To what extent do you agree or disagree with the following statements?                                                           | Strongly disagree    Disagree    Neutral    Agree    Strongly Agree |
| D1                                                                                              | My family and I are worried of the likelihood of getting COVID-19                                                                |                                                                     |
| D2                                                                                              | Future chances of getting COVID-19 before the vaccine are high                                                                   |                                                                     |
| D3                                                                                              | I will be very sick if I get COVID-19                                                                                            |                                                                     |
| D4                                                                                              | If I suffer from COVID-19 it means I cannot be infected again hence I don't need to take precautions                             |                                                                     |
| D5                                                                                              | Wearing a mask in public is a good protective measure against COVID-19.                                                          |                                                                     |
| D6                                                                                              | Keeping social distance of 2 meters apart and beyond is a good protective measure against COVID-19 for me and my community.      |                                                                     |
| D7                                                                                              | Frequent hand washing or using alcohol based hand sanitizer is a good protective measure against COVID-19.                       |                                                                     |
| D8                                                                                              | Covering my mouth and nose with hand or elbow when I sneeze, cough can protect my community from COVID-19                        |                                                                     |
| D9                                                                                              | If vaccines are available, they will make me feel less worried about about catching COVID-19                                     |                                                                     |
| D10                                                                                             | I am worried that the side effects of vaccine will affect my health                                                              |                                                                     |
| D11                                                                                             | I am concerned about whether the COVID-19 vaccine actually works or not                                                          |                                                                     |
| <b>Experiences and uptake of COVID-19 prevention measures</b>                                   |                                                                                                                                  |                                                                     |

|     |                                                                                                                      |                                                                                                                                                                                                                                                                                                                                                                                                                                                                                                                                                                                                                                    |
|-----|----------------------------------------------------------------------------------------------------------------------|------------------------------------------------------------------------------------------------------------------------------------------------------------------------------------------------------------------------------------------------------------------------------------------------------------------------------------------------------------------------------------------------------------------------------------------------------------------------------------------------------------------------------------------------------------------------------------------------------------------------------------|
| E1  | Apart from MOH guidelines, what other approaches are community members using to avoid getting infected with COVID-19 | <ul style="list-style-type: none"> <li>a) Use herbal medications e.g garlic, ginger</li> <li>b) Steaming using herbs</li> <li>c) Eating more fruits and vegetables</li> <li>d) Doing exercise</li> <li>e) Other</li> <li>a) None</li> </ul>                                                                                                                                                                                                                                                                                                                                                                                        |
| E2  | Have you ever had experience with COVID-19                                                                           | <ul style="list-style-type: none"> <li>a) Yes</li> <li>b) No</li> </ul>                                                                                                                                                                                                                                                                                                                                                                                                                                                                                                                                                            |
| E3  | Have ever been diagnosed with a disease that lasts for over year and require continuous medical support              | <ul style="list-style-type: none"> <li>a) Yes</li> <li>b) No</li> </ul>                                                                                                                                                                                                                                                                                                                                                                                                                                                                                                                                                            |
| E4  | Within the last 14 days, I have been to a large gathering (burials, community meetings, church, parties etc)         | <ul style="list-style-type: none"> <li>c) Yes</li> <li>d) No</li> </ul>                                                                                                                                                                                                                                                                                                                                                                                                                                                                                                                                                            |
| E5  | I maintain a distance of at least 2m when interacting with other people                                              | <ul style="list-style-type: none"> <li>a) Yes</li> <li>b) sometimes</li> <li>c) No</li> </ul>                                                                                                                                                                                                                                                                                                                                                                                                                                                                                                                                      |
| E6  | I wear a mask every time I leave my home to a public place and when I have coughing or sneezing symptoms             | <ul style="list-style-type: none"> <li>a) Yes</li> <li>b) sometimes</li> <li>c) No</li> </ul>                                                                                                                                                                                                                                                                                                                                                                                                                                                                                                                                      |
| E7  | I wash my hands with water and soap/sanitise frequently (after touching any surface or shared object)                | <ul style="list-style-type: none"> <li>a) Yes</li> <li>b) Sometimes</li> <li>c) No</li> </ul>                                                                                                                                                                                                                                                                                                                                                                                                                                                                                                                                      |
| E8  | Do you cover your mouth and nose with hand or elbow when you cough or sneeze?                                        | <ul style="list-style-type: none"> <li>a) Yes, always</li> <li>b) Yes, only when necessary/ occasionally (public places)</li> <li>c) No</li> </ul>                                                                                                                                                                                                                                                                                                                                                                                                                                                                                 |
| E9  | Do you intend to take COVID-19 vaccines if they become available?                                                    | <ul style="list-style-type: none"> <li>1. Definitely, Yes</li> <li>2. Probably yes</li> <li>3. Probably No</li> <li>4. Definitely No</li> </ul>                                                                                                                                                                                                                                                                                                                                                                                                                                                                                    |
| E10 | If No, what are the reasons                                                                                          | <ul style="list-style-type: none"> <li>a) I don't think COVID-19 exists</li> <li>b) I think the vaccine is not effective</li> <li>c) I think the vaccine is designed to harm us</li> <li>d) I am scared of side-effects of the vaccine</li> <li>e) My body is naturally strong, I don't need a vaccine to fight COVID-19</li> <li>f) I already had COVID-19, so I think I am immune to the disease</li> <li>g) The COVID-19 pandemic is finished in my country, no need for a vaccine now</li> <li>h) Have little information about the vaccine</li> <li>i) None of the above</li> <li>j) Other reasons (please specify</li> </ul> |
| AA1 | Age of the respondent<br>Hint: ask for date of birth                                                                 | ..... (in complete years)                                                                                                                                                                                                                                                                                                                                                                                                                                                                                                                                                                                                          |

|     |                                                  |                                                                                                                                                                                                                               |
|-----|--------------------------------------------------|-------------------------------------------------------------------------------------------------------------------------------------------------------------------------------------------------------------------------------|
| AA2 | On average how much money do you earn per month? | <ol style="list-style-type: none"><li>1. <math>\leq 50,000</math></li><li>2. 50,001 – 100,000</li><li>3. 100,001 – 200,000</li><li>4. 200,001 – 500,000</li><li>5. 500,001 – 1000,000</li><li>6. 1000,001 and above</li></ol> |
|-----|--------------------------------------------------|-------------------------------------------------------------------------------------------------------------------------------------------------------------------------------------------------------------------------------|

Thank you alot for your time. We really appreciate
