# Supplementary material for: Intention to vaccinate against COVID-19 and adherence to non-pharmaceutical interventions against COVID-19 prior to the second wave of the pandemic in Uganda: a cross-sectional study
Source: PubMed Central journal article supplement — BMJ Open. 2022 Jun 2;12(6):e057322. doi: 10.1136/bmjopen-2021-057322 (PMC9163003; doi:10.1136/bmjopen-2021-057322), 2022-06-02
Supplement: bmjopen-2021-057322supp002.pdf [file bmjopen-2021-057322supp002.pdf]

## Supplementary file2: Bivariate Results

**Table S2.1. Factors associated non-adherence to COVID-19 prevention guidelines / protocols (bivariate Analysis)**

| Characteristics                 | adherent<br>(n=107) | Nonadherent<br>(n=1946) | Un-adjusted PR<br>(95% CI) | P-value |
|---------------------------------|---------------------|-------------------------|----------------------------|---------|
| <b>Demographics</b>             |                     |                         |                            |         |
| <b>Region</b>                   |                     |                         |                            |         |
| Central                         | 81 (14.7)           | 472 (85.4)              | 1                          |         |
| Eastern                         | 11 (6.5)            | 158 (93.5)              | 0.41 (0.21 – 0.78)         | 0.007   |
| Northern                        | 7 (4.0)             | 167 (96.0)              | 0.24 (0.11 – 0.54)         | < 0.001 |
| Western                         | 8 (5.1)             | 149 (94.9)              | 0.31 (0.15 – 0.66)         | 0.002   |
| <b>Residence</b>                |                     |                         |                            |         |
| Rural                           | 484 (88.8)          | 61 (11.2)               | 1                          |         |
| Urban                           | 462 (90.9)          | 46 (9.1)                | 0.79 (0.53 – 1.18)         | 0.252   |
| <b>Age</b>                      |                     |                         |                            |         |
| 18-34                           | 59 (11.1)           | 471 (88.9)              | 1                          |         |
| 35-54                           | 38 (9.1)            | 381 (90.9)              | 0.80 (0.52 – 1.22)         | 0.298   |
| 55-64                           | 8 (11.0)            | 65 (89.0)               | 0.98 (0.45 – 2.14)         | 0.965   |
| 65+                             | 2 (6.4)             | 29 (93.6)               | 0.55 (0.13 – 2.37)         | 0.422   |
| <b>Gender</b>                   |                     |                         |                            |         |
| Female                          | 50 (12.4)           | 352 (87.6)              | 1                          |         |
| Male                            | 57 (8.8)            | 594 (91.2)              | 0.68 (0.45 – 1.01)         | 0.056   |
| <b>Education</b>                |                     |                         |                            |         |
| No formal Education             | 71 (89.9)           | 8 (10.1)                | 1                          |         |
| Primary                         | 311 (90.1)          | 34 (9.9)                | 0.97 (0.43 – 2.19)         | 0.942   |
| Secondary                       | 345 (89.4)          | 41 (10.6)               | 1.05 (0.47 – 2.35)         | 0.896   |
| Tertiary                        | 219 (90.1)          | 24 (9.9)                | 0.97 (0.42 – 2.26)         | 0.949   |
| <b>Occupation</b>               |                     |                         |                            |         |
| Casual Labourer                 | 49 (87.5)           | 7 (12.5)                | 1                          |         |
| Farmer                          | 237 (91.2)          | 23 (8.9)                | 0.68 (0.28 – 1.67)         | 0.400   |
| Formally Employed               | 156 (91.3)          | 15 (8.8)                | 0.67 (0.26 – 1.75)         | 0.415   |
| House Wife                      | 55 (93.2)           | 4 (6.8)                 | 0.51 (0.14 – 1.84)         | 0.304   |
| Self Employed                   | 323 (87.8)          | 45 (12.2)               | 0.98 (0.42 – 2.28)         | 0.954   |
| Unemployed                      | 59 (89.4)           | 7 (10.6)                | 0.83 (0.27 – 2.53)         | 0.744   |
| Student                         | 43 (93.5)           | 3 (6.5)                 | 0.49 (0.12 – 2.01)         | 0.320   |
| Others                          | 24 (88.9)           | 3 (11.1)                | 0.88 (0.21 – 3.69)         | 0.856   |
| <b>Household Size</b>           |                     |                         |                            |         |
| <5                              | 47 (12.6)           | 327 (87.4)              | 1                          |         |
| 5 – 10                          | 52 (8.9)            | 533 (91.1)              | 0.68 (0.45 – 1.03)         | 0.069   |
| >10                             | 8 (8.5)             | 86 (91.5)               | 0.65 (0.29 – 1.42)         | 0.278   |
| <b>Monthly Income (USD)</b>     |                     |                         |                            |         |
| ≤ 13.7                          | 18 (7.7)            | 217 (92.3)              | 1                          |         |
| 13.7 – 27.4                     | 13 (7.9)            | 152 (92.1)              | 1.03 (0.49 – 2.17)         | 0.936   |
| 27.4 – 54.8                     | 17 (8.6)            | 180 (91.4)              | 1.14 (0.57 – 2.27)         | 0.713   |
| 54.8 – 137                      | 33 (11.4)           | 256 (88.6)              | 1.55 (0.85 – 2.83)         | 0.151   |
| ≥137                            | 25 (16.4)           | 127 (83.6)              | 2.37 (1.24 – 4.52)         | 0.009   |
| <b>COVID-19 Knowledge Level</b> |                     |                         |                            |         |

|                                                                                                              |            |            |                    |       |
|--------------------------------------------------------------------------------------------------------------|------------|------------|--------------------|-------|
| Low                                                                                                          | 61(88.4)   | 8 (11.6)   | 1                  |       |
| High                                                                                                         | 885 (89.9) | 99 (10.1)  | 0.85 (0.40 – 1.83) | 0.684 |
| <b>Perception of COVID-19 prevention measure</b>                                                             |            |            |                    |       |
| Poor perception                                                                                              | 100 (92.6) | 8 (7.4)    | 1                  |       |
| Good perception                                                                                              | 846 (89.5) | 99 (10.5)  | 1.46 (0.69 – 3.10) | 0.320 |
| <b>Ever had experience with COVID-19</b>                                                                     |            |            |                    |       |
| No                                                                                                           | 712 (89.7) | 82 (10.3)  | 1                  |       |
| Yes                                                                                                          | 234 (90.4) | 25 (9.7)   | 0.93 (0.58 – 1.49) | 0.755 |
| <b>Reported history of chronic disease</b>                                                                   |            |            |                    |       |
| No                                                                                                           | 733 (91.2) | 71 (8.8)   | 1                  |       |
| Yes                                                                                                          | 213 (85.5) | 36 (14.5)  | 1.74 (1.14 – 2.68) | 0.010 |
| <b>Worry about the likelihood of getting COVID-19</b>                                                        |            |            |                    |       |
| Strongly agree/Agree                                                                                         | 763 (90.2) | 83 (9.8)   | 1                  |       |
| Strongly disagree/Disagree                                                                                   | 183 (88.4) | 24 (11.6)  | 1.21 (0.74 – 1.95) | 0.447 |
| <b>Future chances before the vaccine are high</b>                                                            |            |            |                    |       |
| Strongly agree/Agree                                                                                         | 707 (90.1) | 78 (9.9)   | 1                  |       |
| Strongly Disagree/Disagree                                                                                   | 239 (89.2) | 29 (10.8)  | 1.10 (0.70 – 1.73) | 0.679 |
| <b>Will be very sick if I get COVID-19</b>                                                                   |            |            |                    |       |
| Strongly agree/Agree                                                                                         | 77 (9.6)   | 723 (90.4) | 1                  |       |
| Strongly disagree/Disagree                                                                                   | 30 (11.9)  | 223 (88.1) | 1.26 (0.81 – 1.98) | 0.306 |
| <b>If I suffer from COVID-19, I cannot be infected again and will not need to take preventive precaution</b> |            |            |                    |       |
| Strongly agree/Agree                                                                                         | 33 (12.2)  | 237 (87.8) | 1                  |       |
| Strongly disagree/Disagree                                                                                   | 74 (9.4)   | 709 (90.6) | 0.75 (0.48 – 1.16) | 0.195 |
|                                                                                                              |            |            |                    |       |

**Table S2.2: Factors associated with a definite intention to take a COVID-19 vaccine ((bivariate Analysis)**

| Characteristics     | Definitely Yes (n=609) | Probably yes/Probably no/Definitely no (n=444) | Un-adjusted PR (95% CI) | P-value |
|---------------------|------------------------|------------------------------------------------|-------------------------|---------|
| <b>Demographics</b> |                        |                                                |                         |         |
| <b>Region</b>       |                        |                                                |                         |         |
| Central             | 292 (52.8)             | 261 (47.2)                                     | 1                       |         |
| Eastern             | 94 (55.6)              | 75 (44.4)                                      | 1.05 (0.90-1.23)        | 0.514   |
| Northern            | 114 (65.5)             | 60 (34.5)                                      | 1.24 (1.09-1.42)        | 0.002   |
| Western             | 109 (69.4)             | 48 (30.6)                                      | 1.31 (1.15-1.50)        | <0.001  |

|                                                       |            |            |                  |        |
|-------------------------------------------------------|------------|------------|------------------|--------|
| <b>Residence</b>                                      |            |            |                  |        |
| Rural                                                 | 322 (59.1) | 223 (40.9) | 1                |        |
| Urban                                                 | 287 (56.5) | 221 (43.5) | 0.96 (0.86-1.06) | 0.397  |
| <b>Age</b>                                            |            |            |                  |        |
| 18-34                                                 | 284 (53.6) | 246 (46.4) | 1                |        |
| 35-54                                                 | 252 (60.1) | 167 (39.9) | 1.12 (1.01-1.25) | 0.042  |
| 55-64                                                 | 51 (69.9)  | 22 (30.1)  | 1.30 (1.10-1.55) | 0.002  |
| 65+                                                   | 22 (71.0)  | 9 (29.0)   | 1.32 (1.04-1.68) | 0.021  |
| <b>Gender</b>                                         |            |            |                  |        |
| Female                                                | 238 (59.2) | 164 (40.8) | 1                |        |
| Male                                                  | 371 (57.0) | 280 (43.0) | 0.96 (0.87-1.07) | 0.477  |
| <b>Education</b>                                      |            |            |                  |        |
| No formal Education                                   | 47 (59.5)  | 32 (40.5)  | 1                |        |
| Primary                                               | 198 (57.4) | 147 (42.6) | 0.96 (0.79-1.18) | 0.729  |
| Secondary                                             | 220 (57.0) | 166 (43.0) | 0.96 (0.78-1.17) | 0.677  |
| Tertiary                                              | 144 (59.3) | 99 (40.7)  | 1.00 (0.81-1.23) | 0.971  |
| <b>Occupation</b>                                     |            |            |                  |        |
| Casual Labourer                                       | 30 (53.6)  | 26 (46.4)  | 1                |        |
| Farmer                                                | 156 (60.0) | 104 (40.0) | 1.12(0.86-1.46)  | 0.399  |
| Formally Employed                                     | 109 (63.7) | 62 (36.3)  | 1.19 (0.91-1.56) | 0.205  |
| House Wife                                            | 27 (45.8)  | 32 (54.2)  | 0.85 (0.59-1.24) | 0.404  |
| Self Employed                                         | 203 (55.2) | 165 (44.8) | 1.03 (0.79-1.34) | 0.826  |
| Unemployed                                            | 45 (68.2)  | 21 (21.8)  | 1.27 (0.95-1.71) | 0.108  |
| Student                                               | 22 (47.8)  | 24(52.2)   | 0.89 (0.61-1.32) | 0.567  |
| Others                                                | 17 (63.0)  | 10 (37.0)  | 1.18 (0.80-1.72) | 0.403  |
| <b>COVID-19 Knowledge Level</b>                       |            |            |                  |        |
| Low                                                   | 37 (53.6)  | 32 (46.4)  | 1                |        |
| High                                                  | 572 (58.1) | 412 (41.9) | 1.08 (0.86-1.36) | 0.484  |
| <b>Perception of COVID-19 prevention measure</b>      |            |            |                  |        |
| Poor perception                                       | 53 (49.1)  | 55 (50.9)  | 1                |        |
| Good perception                                       | 556 (58.8) | 389 (41.2) | 1.20 (0.98-1.46) | 0.075  |
| <b>Ever had experience with COVID-19</b>              |            |            |                  |        |
| No                                                    | 450 (56.7) | 344 (43.3) | 1                |        |
| Yes                                                   | 159 (61.4) | 100 (38.6) | 1.08 (0.97-1.21) | 0.170  |
| <b>Ever diagnosed with chronic disease</b>            |            |            |                  |        |
| No                                                    | 453 (56.3) | 351 (43.7) | 1                |        |
| Yes                                                   | 156 (62.7) | 93 (37.3)  | 1.11 (0.99-1.25) | 0.067  |
| <b>Worry about the likelihood of getting COVID-19</b> |            |            |                  |        |
| Strongly agree/Agree                                  | 514 (60.8) | 332 (39.2) | 1.32 (1.13-1.55) | <0.001 |
| Strongly disagree/Disagree                            | 95 (45.9)  | 112 (54.1) | 1                |        |

|                                                                                                              |            |            |                    |         |
|--------------------------------------------------------------------------------------------------------------|------------|------------|--------------------|---------|
| <b>Future chances before the vaccine are high</b>                                                            |            |            |                    |         |
| Strongly agree/Agree                                                                                         | 474 (60.4) | 311 (39.6) | 1.20 (1.05-1.37)   | 0.007   |
| Strongly Disagree/Disagree                                                                                   | 135 (50.4) | 133 (49.6) | 1                  |         |
| <b>Will be very sick if I get COVID-19</b>                                                                   |            |            |                    |         |
| Strongly agree/Agree                                                                                         | 489 (61.1) | 311 (38.9) | 1.29 (1.12-1.48)   | <0.001  |
| Strongly disagree/Disagree                                                                                   | 120 (47.4) | 133 (52.6) | 1                  |         |
| <b>If I suffer from COVID-19, I cannot be infected again and will not need to take preventive precaution</b> |            |            |                    |         |
| Strongly agree/Agree                                                                                         | 154 (57.0) | 116 (43.0) | 0.98 (0.87-1.11)   | 0.760   |
| Strongly disagree/Disagree                                                                                   | 455 (58.1) | 328 (41.9) | 1                  |         |
| <b>Concerned about the side effects of the COVID-19</b>                                                      |            |            |                    |         |
| Strongly disagree/Disagree                                                                                   | 310 (66.1) | 159 (33.9) | 1                  |         |
| Strongly agree/Agree                                                                                         | 299 (51.2) | 285 (48.8) | 0.77 (0.70 – 0.86) | < 0.001 |
| <b>Concerned about the efficacy of the COVID-19 vaccines</b>                                                 |            |            |                    |         |
| Strongly disagree/Disagree                                                                                   | 231 (58.5) | 164 (41.5) | 1                  |         |
| Strongly agree/Agree                                                                                         | 378 (57.5) | 280 (42.5) | 0.98 (0.88 – 1.09) | 0.742   |
